# Supplementary material
Source: PubMed Central journal article supplement (PMC6689326)

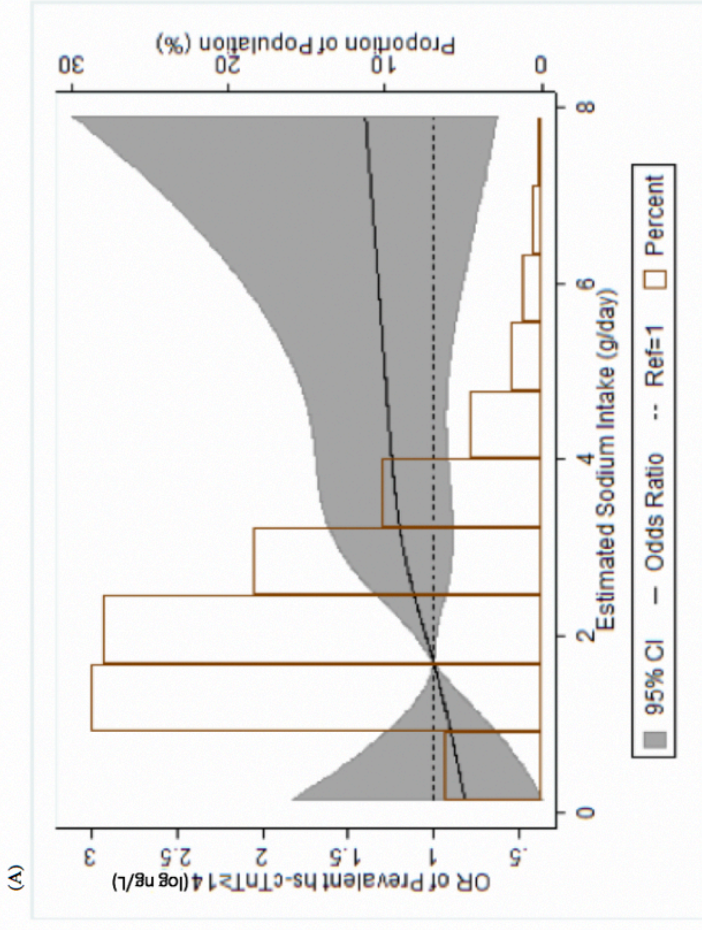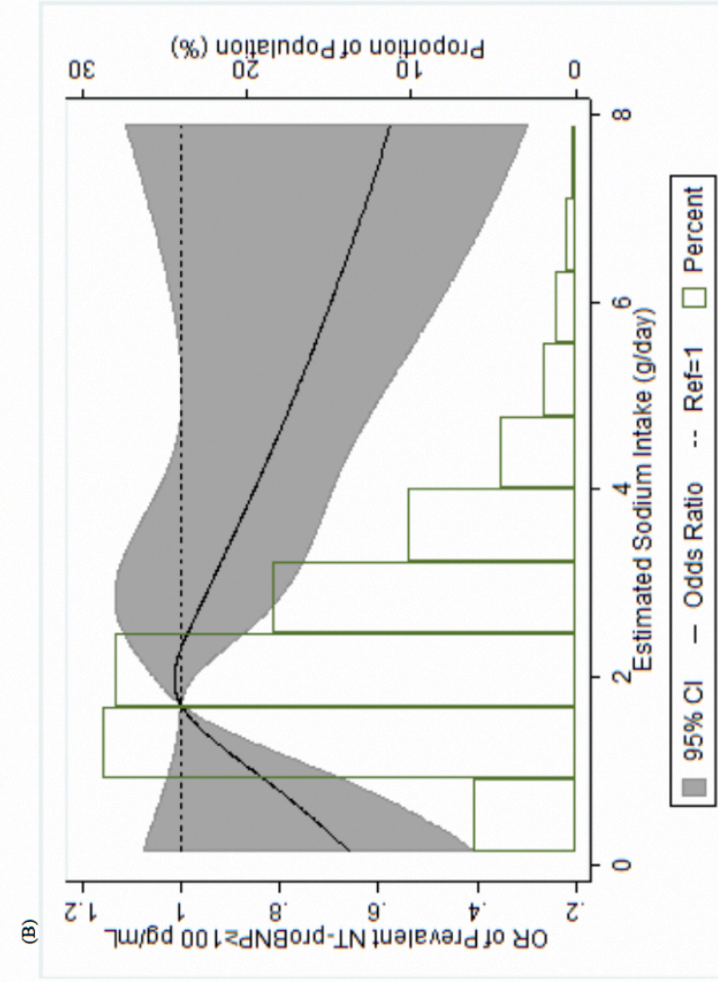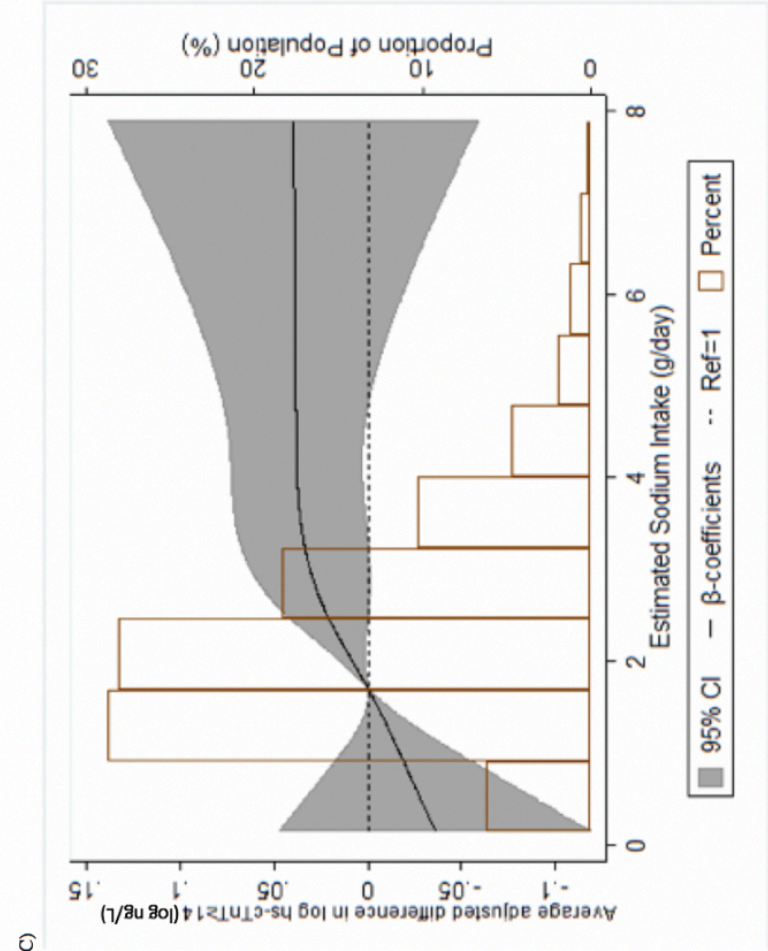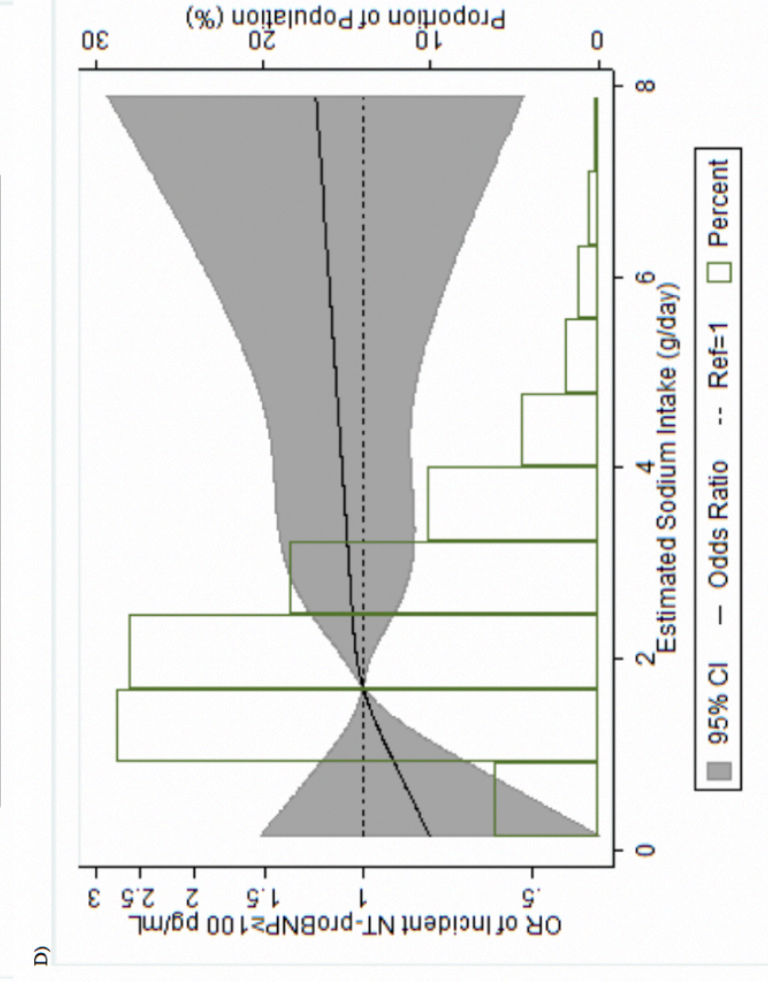

Supplement: NIHMS1534137-supplement-1.pdf [file NIHMS1534137-supplement-1.pdf]

B)

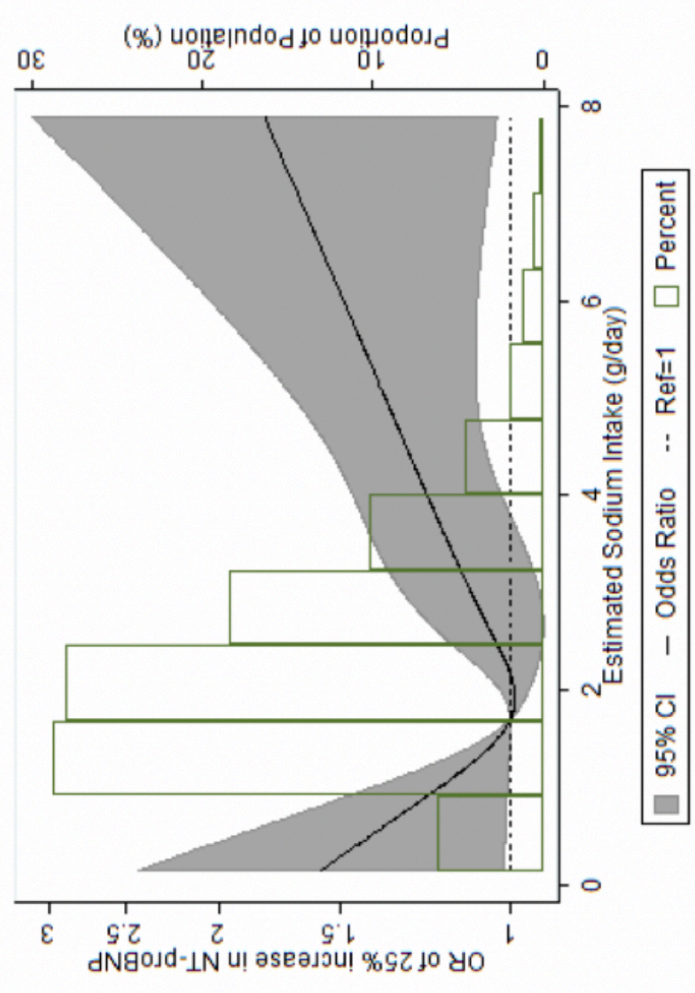

A)

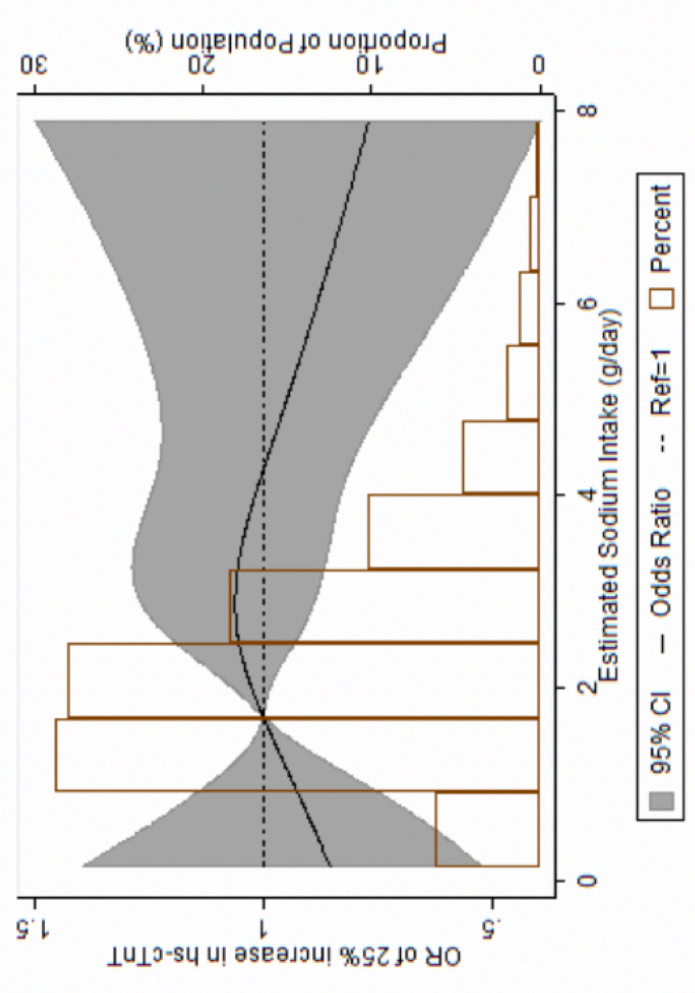

Supplement: NIHMS1534137-supplement-2.pdf [file NIHMS1534137-supplement-2.pdf]
